# Supplementary material for: A detailed investigation of light-harvesting efficiency of blue color emitting divergent iridium dendrimers with peripheral phenylcarbazole units
Source: Royal Society of Chemistry journal article supplement (doi:10.1039/c3cp53797h), 2013-10-29
Supplement: c3cp53797h.pdf [file c3cp53797h.pdf]

*Electronic Supporting Information*

**A detailed investigation on light-harvesting efficiency of blue color emitting  
divergent iridium dendrimers with peripheral phenylcarbazole units**

*Yang-Jin Cho, Kyung-Ryang Wee, Ho-Jin Son, Dae Won Cho,\* and Sang Ook Kang\**

Department of Advanced Materials Chemistry, Korea University (Sejong Campus), Sejong 339-700, Korea.

**Contents**

**Fig. S1.** Absorption and emission spectra of carbazole dendrons.

**Fig. S2.** Phosphorescence decay profiles of dendrimers.

**Fig. S3.** Optimized molecular structures of **G<sub>n</sub>** (n= 1, 2, and 3) using the semi-empirical calculation (PM3 method).

**Fig. S4.** Energy levels and isodensity plots for selected occupied and unoccupied molecular orbitals of **G1**.

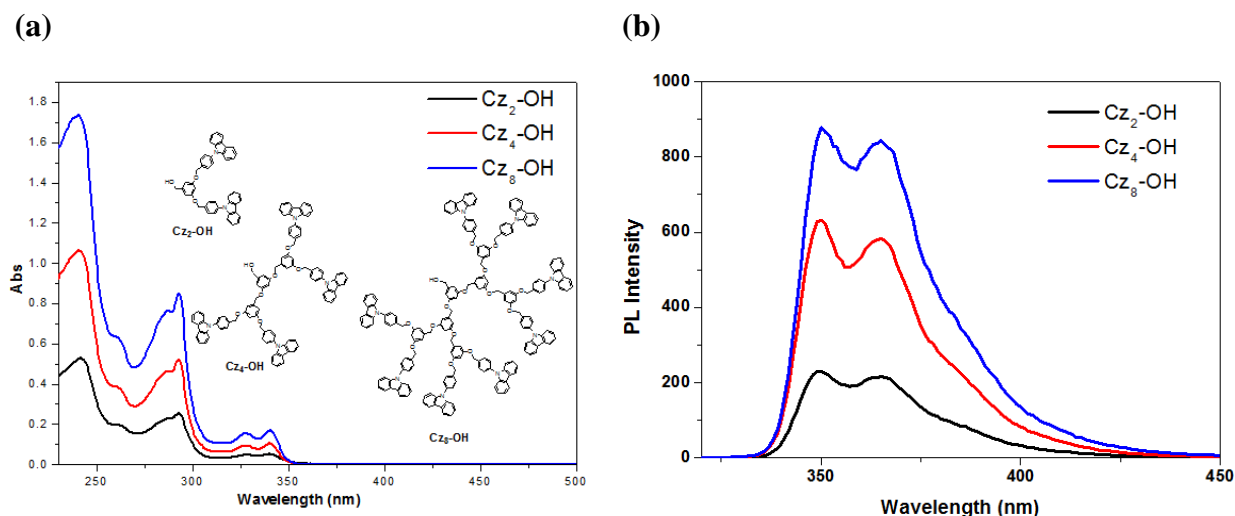

**Fig. S1.** (a) Absorption and (b) emission spectra of the  $\text{Cz}_n\text{-OH}$  ( $n = 2, 4$ , and  $8$ ) in  $4 \mu\text{M}$   $\text{CH}_2\text{Cl}_2$  at the room temperature (excited at 290 nm).

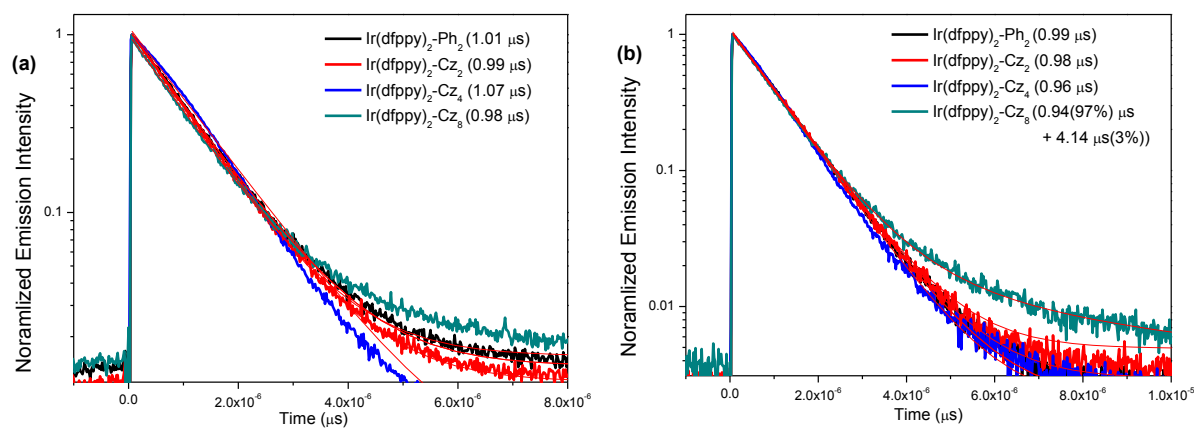

**Fig. S2.** Phosphorescence decay profiles monitored at 500 nm for  $\text{Ir}(\text{dfppy})_2(\text{pic-Ph}_2)$  and  $\text{Ir}(\text{dfppy})_2(\text{pic-Cz}_n)$  ( $n = 2, 4$ , and  $8$ ) in Ar-saturated  $\text{CH}_2\text{Cl}_2$  at room temperature: (a) excited at 309 nm, and (b) excited at 416 nm.

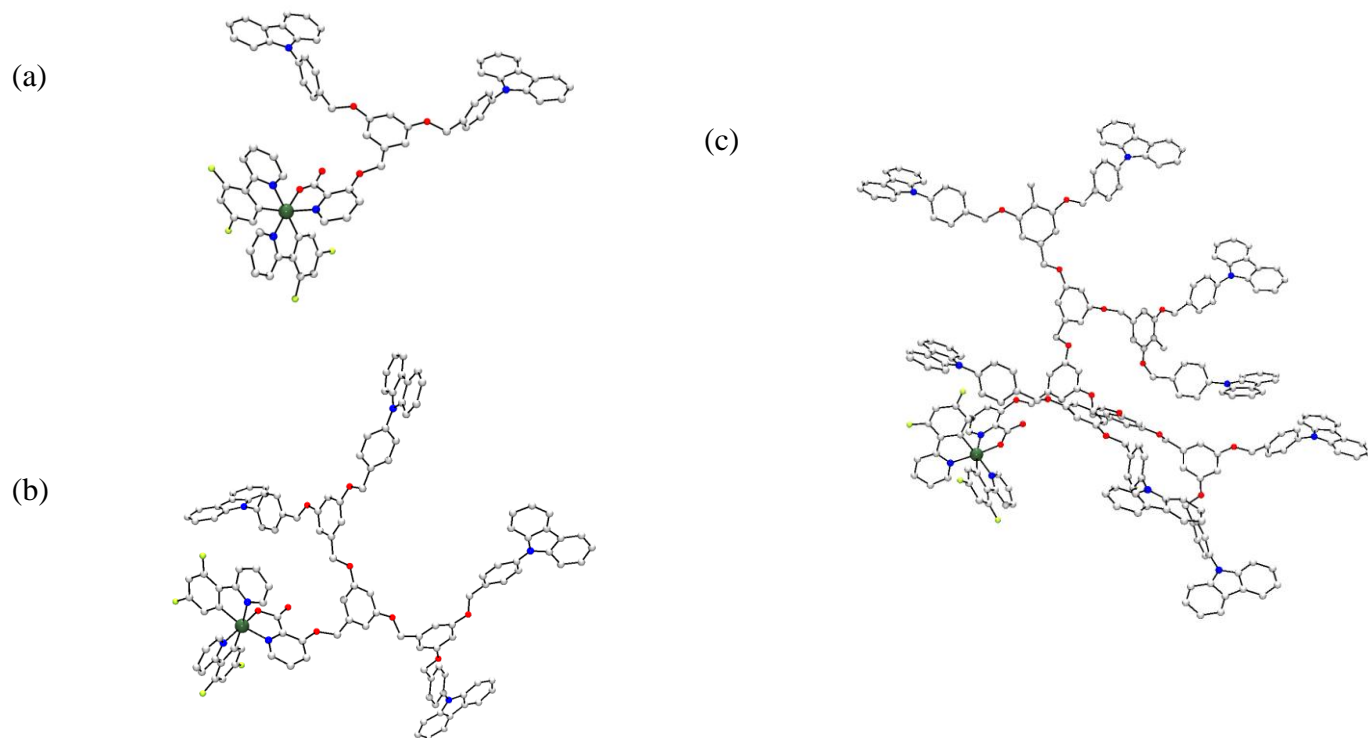

**Fig. S3.** Optimized molecular structures of **Gn** ( $n = 1, 2$ , and  $3$ ) using the semi-empirical calculation (PM3 method) (a) **G1**, (b) **G2**, (c) **G3**.

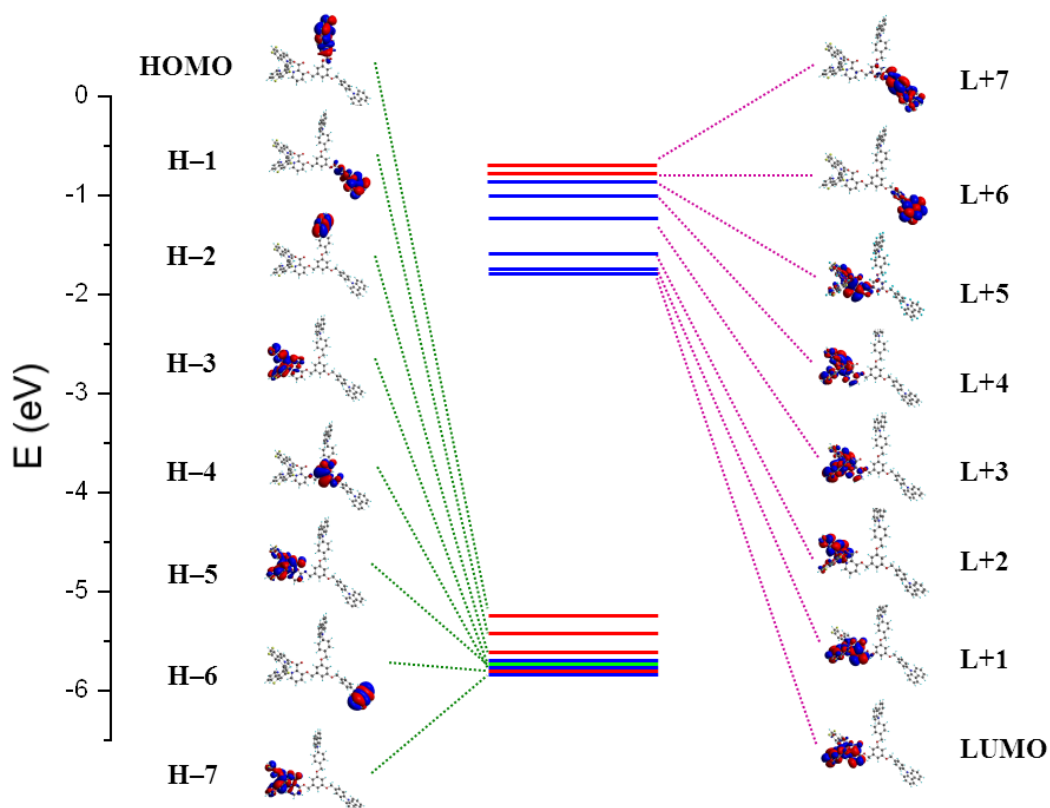

**Fig. S4.** Energy levels and isodensity plots for selected occupied and unoccupied molecular orbitals of **G1**.
